# Supplementary material
Source: PubMed Central journal article supplement (PMC3837288)
Supplement: NIHMS34038-supplement-1.pdf [file NIHMS34038-supplement-1.pdf]

## Supplementary Figure Legends

Fig. S1 Anti-prM responses during primary DENV infection.

Western blots of C6/36 cell lysates infected with DENV1-DENV4 and probed with primary immune DENV serum (A). Plasma diluted 1 in 100 from five cases each of DENV1, DENV2 and DENV3 were analysed by Western blot for anti-prM against the four DENV serotypes and reactivity was then scored (B).

Fig. S2 Reactivity of human anti-prM monoclonal antibodies.

Reactivity of the 6 anti-prM antibodies to reduced (R) and non-reduced (N) DENV infected cell lysates showing loss of reactivity on reduced Western blots (A). To show reactivity to the pr peptide, western blotting of culture supernatant (non-heat/non-reduced) from DENV (B) and mock (C) infected cells was performed. Non reduced gels were run in loading buffer lacking 2-mercaptoethanol which were also non-heat treated.

Fig. S3 Neutralisation and ADE of anti-E and anti-prM antibodies.

Culture supernatants from 20 anti-E and 20 anti-prM cell lines, all of which were specific to DENV2 and cross-reactive with other DENV serotypes, were assayed in neutralization and ADE assays to DENV 2 strain 16681. Neutralisation was performed by focus forming assay on Vero cells using a 1:2 dilution of supernatant while ADE was performed using a 1:100 dilution on U937 cells and infection read by FACS using 4G2 (A and B). Control experiment showing roughly equal levels of infection of monocytes in the presence of the 6 anti-prM monoclonal antibodies when assayed by intracellular staining for either DENV envelope (4G2) or DENV non-structural protein-1 (2G6). Two irrelevant human antibodies are also shown (C). Histograms showing higher amplitude staining with 4G2 (anti-E) compared to 2G6 (anti-NS1), 4G2 was selected for the intracellular staining assays (D).

Fig. S4 Infectivity of virus produced in furin deficient LoVo cells.

LoVo produced virus has a high prM:E ratio measured by ELISA (A). Silver stained gel (non-reduced) of DENV immunoprecipitated with 4G2 showing absence of M in LoVo cells and reduction in M in virus produced in the presence of ammonium chloride (B). Enhancement of infection of LoVo produced virus by anti-prM antibody (C). Infection of U937 cells was detected by FACS with mAb 4G2 at 3 days post infection.

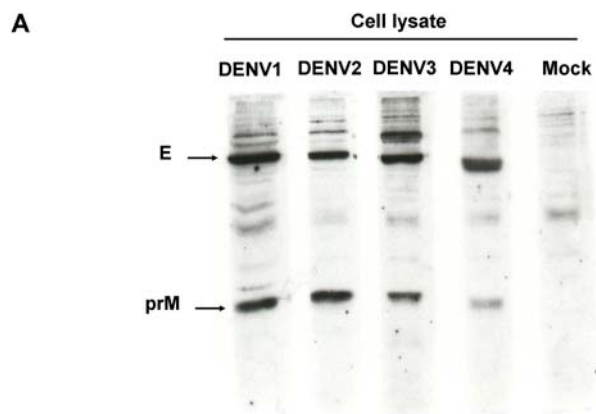

**B Reactivity of primary serum**

| Serotype of primary | Western blot |       |       |       |
|---------------------|--------------|-------|-------|-------|
|                     | DENV1        | DENV2 | DENV3 | DENV4 |
| DENV1 (n=5)         | 5            | 5     | 5     | 2     |
| DENV2 (n=5)         | 5            | 5     | 5     | 1     |
| DENV3 (n=5)         | 3            | 5     | 5     | 5     |

**Fig. S1**

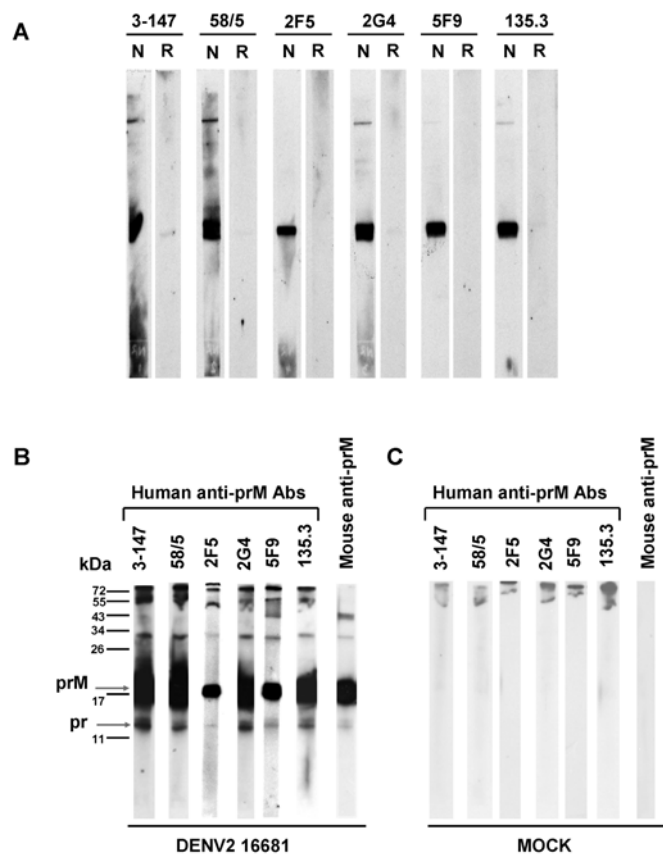

Fig S2

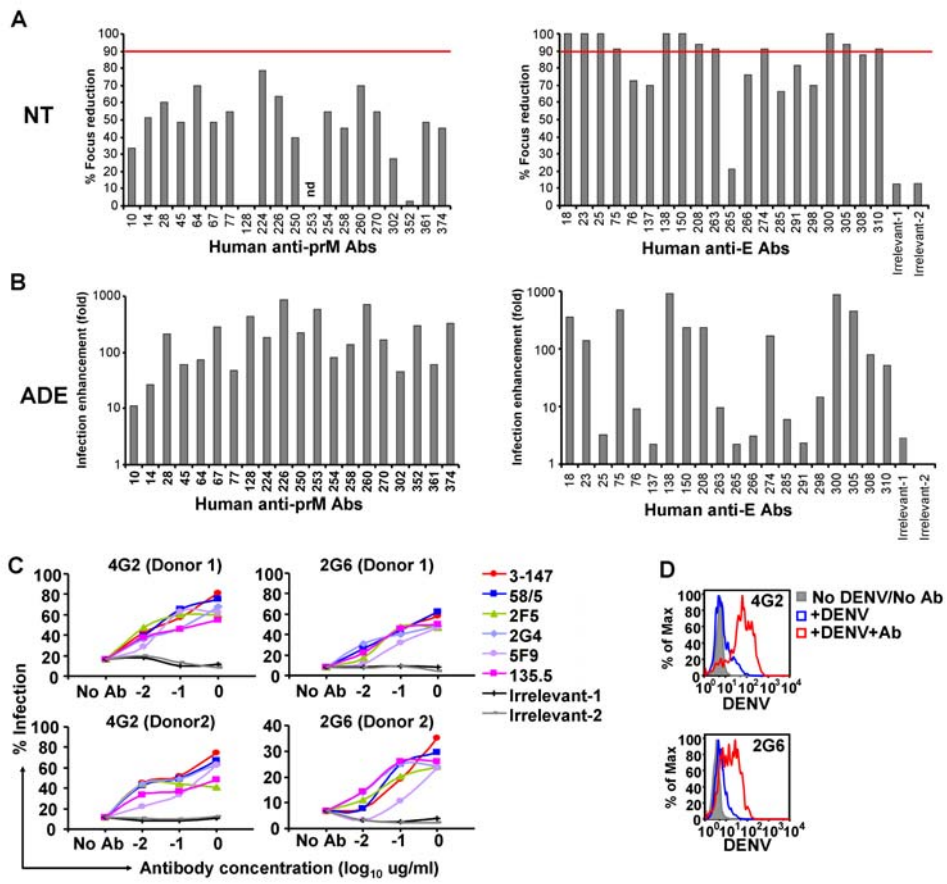

Fig. S3

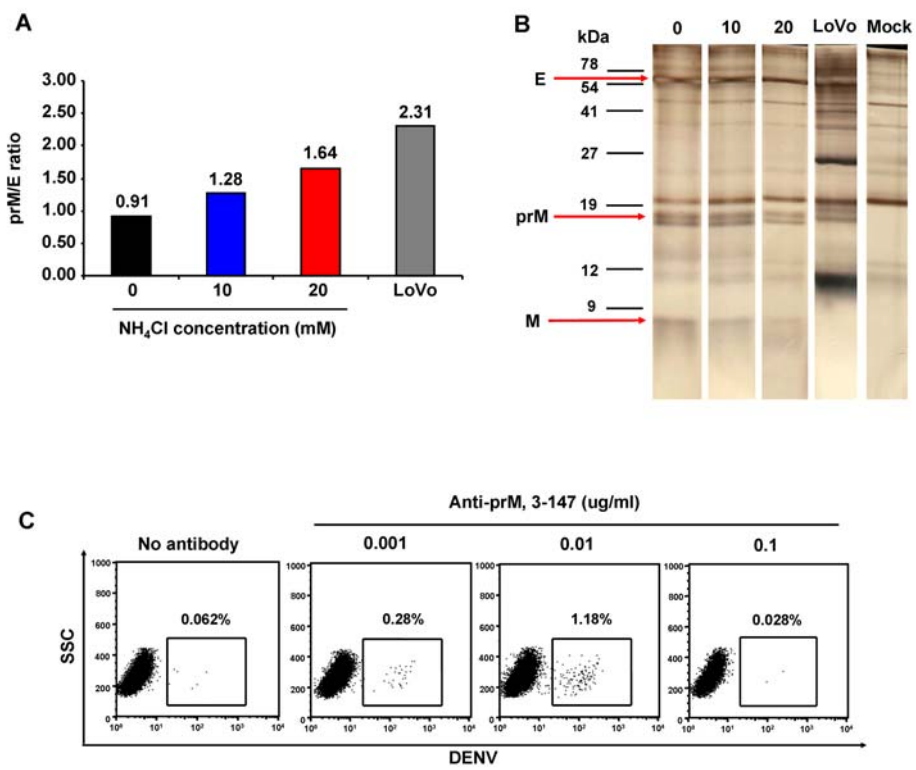

Fig. S4

**Table S1. Summary of DENV-infected patients enrolled in the study**

| <b>Patient ID</b> | <b>Severity</b> | <b>Serotype of infection</b> | <b>Day after defervescence</b> | <b>No. of positive BCL (n= 301)</b> |
|-------------------|-----------------|------------------------------|--------------------------------|-------------------------------------|
| 1                 | DF              | DENV2                        | 19                             | 19                                  |
| 2                 | DHF1            | DENV2                        | 23                             | 54                                  |
| 3                 | DHF1            | DENV2                        | 17                             | 53                                  |
| 4                 | DHF1            | Unknown                      | 15                             | 76                                  |
| 5                 | DHF1            | DENV1                        | 17                             | 69                                  |
| 6                 | DHF2            | DENV4                        | 24                             | 20                                  |
| 7                 | DHF3            | DENV2                        | 20                             | 10                                  |

**Table S2a . Antibody responses against prM and E**

| Patient ID | Serotype | anti-structural (n) | anti-prM(n) | anti-E(n) | %prM |
|------------|----------|---------------------|-------------|-----------|------|
| 1          | 2        | 16                  | 11          | 5         | 68.8 |
| 2          | 2        | 30                  | 12          | 18        | 40.0 |
| 3          | 2        | 33                  | 23          | 10        | 69.7 |
| 4          | unknown  | 43                  | 26          | 17        | 60.5 |
| 5          | 1        | 44                  | 29          | 15        | 65.9 |
| 6          | 4        | 3                   | 0           | 3         | 0.0  |
| 7          | 2        | 3                   | 2           | 1         | 66.7 |
| total      |          | 172                 | 103         | 69        | 59.9 |

**Table S2b. Antibody cross reactivity among DENV serotypes**

| Patient ID | Serotype | prM   |           |             | E    |         |          | NS1  |         |          |
|------------|----------|-------|-----------|-------------|------|---------|----------|------|---------|----------|
|            |          | full* | partial** | specific*** | full | partial | specific | full | partial | specific |
| 1          | 2        | 9     | 2         | 0           | 5    | 0       | 0        | 2    | 1       | 0        |
| 2          | 2        | 11    | 0         | 1           | 18   | 0       | 0        | 4    | 4       | 8        |
| 3          | 2        | 23    | 0         | 0           | 10   | 0       | 0        | 12   | 3       | 1        |
| 4          | unknown  | 24    | 2         | 0           | 12   | 4       | 1        | 6    | 10      | 2        |
| 5          | 1        | 28    | 0         | 1           | 13   | 2       | 0        | 7    | 4       | 1        |
| 6          | 4        | 0     | 0         | 0           | 2    | 1       | 0        | 6    | 8       | 1        |
| 7          | 2        | 2     | 0         | 0           | 1    | 0       | 0        | 1    | 0       | 0        |

\*cross reacts with all 4 serotypes

\*\* cross reacts with 2-3 serotypes

\*\*\* reacts only one serotype

**Table S2c Antibody cross reactivity between DENV and JEV**

| Patient ID | Serotype | prM       |        | E        |      | NS1      |      |
|------------|----------|-----------|--------|----------|------|----------|------|
|            |          | DENV+JEV* | DENV** | DENV+JEV | DENV | DENV+JEV | DENV |
| 1          | 2        | 1         | 10     | 2        | 3    | 0        | 3    |
| 2          | 2        | 0         | 12     | 17       | 1    | 2        | 14   |
| 3          | 2        | 1         | 22     | 8        | 2    | 1        | 15   |
| 4          | unknown  | 0         | 26     | 9        | 8    | 0        | 18   |
| 5          | 1        | 1         | 28     | 6        | 9    | 0        | 12   |
| 6          | 4        | 0         | 0      | 2        | 1    | 3        | 12   |
| 7          | 2        | 0         | 2      | 0        | 1    | 0        | 1    |

\*cross reacts between DENV and JEV

\*\* no cross-reaction to JEV

**Table S3. Amino acid sequence homology among members of *Flaviviridae* family**

|        | DENV1 |     |     |
|--------|-------|-----|-----|
|        | prM   | E   | NS1 |
| DENV 1 | 100   | 100 | 100 |
| DENV 2 | 73    | 69  | 73  |
| DENV 3 | 80    | 77  | 78  |
| DENV 4 | 65    | 63  | 69  |
| JEV    | 35    | 50  | 51  |
| KUN    | 33    | 50  | 50  |
| SLE    | 35    | 49  | 53  |
| TBE    | 22    | 38  | 37  |
| WN     | 34    | 51  | 51  |
| YF     | 33    | 42  | 42  |



**Table S4. Characteristics of the human antibodies**

| Monoclonal antibody | Isotype (ELISA) | Immunoblot | Specificity |       |       |       |     |
|---------------------|-----------------|------------|-------------|-------|-------|-------|-----|
|                     |                 |            | DENV1       | DENV2 | DENV3 | DENV4 | JEV |
| 3-147               | IgG1 (Kappa)    | prM        | +           | +     | +     | +     | -   |
| 58/5                | IgG1 (Lamda)    | prM        | +           | +     | +     | +     | -   |
| 2F5                 | IgG1 (Lamda)    | prM        | +           | +     | +     | +     | -   |
| 2G4                 | IgG1 (Kappa)    | prM        | +           | +     | +     | +     | -   |
| 5F9                 | IgG1 (Lamda)    | prM        | +           | +     | +     | +     | -   |
| 135.3               | IgG1 (Kappa)    | prM        | +           | +     | +     | +     | -   |
